# Supplementary material for: Aqueous chlorination of mefenamic acid: kinetics, transformation by-products and ecotoxicity assessment
Source: Royal Society of Chemistry journal article supplement (doi:10.1039/c6em00017g), 2016-01-01
Supplement: c6em00017g1.pdf [file c6em00017g1.pdf]

**Electronic Supplementary Information**

**Aqueous chlorination of mefenamic acid: Kinetics, transformation by-products and ecotoxicity assessment**

Wan Nor Adira Wan Khalit<sup>a</sup>, Kheng Soo Tay<sup>a,\*</sup>

*<sup>a</sup>Environmental Research Group, Department of Chemistry, Faculty of Science, University of Malaya, 50603 Kuala Lumpur, Malaysia*

\*Tel: +603-79677022 ext 2145; Email: khengsoo@um.edu.my

**a) Mfe-242**

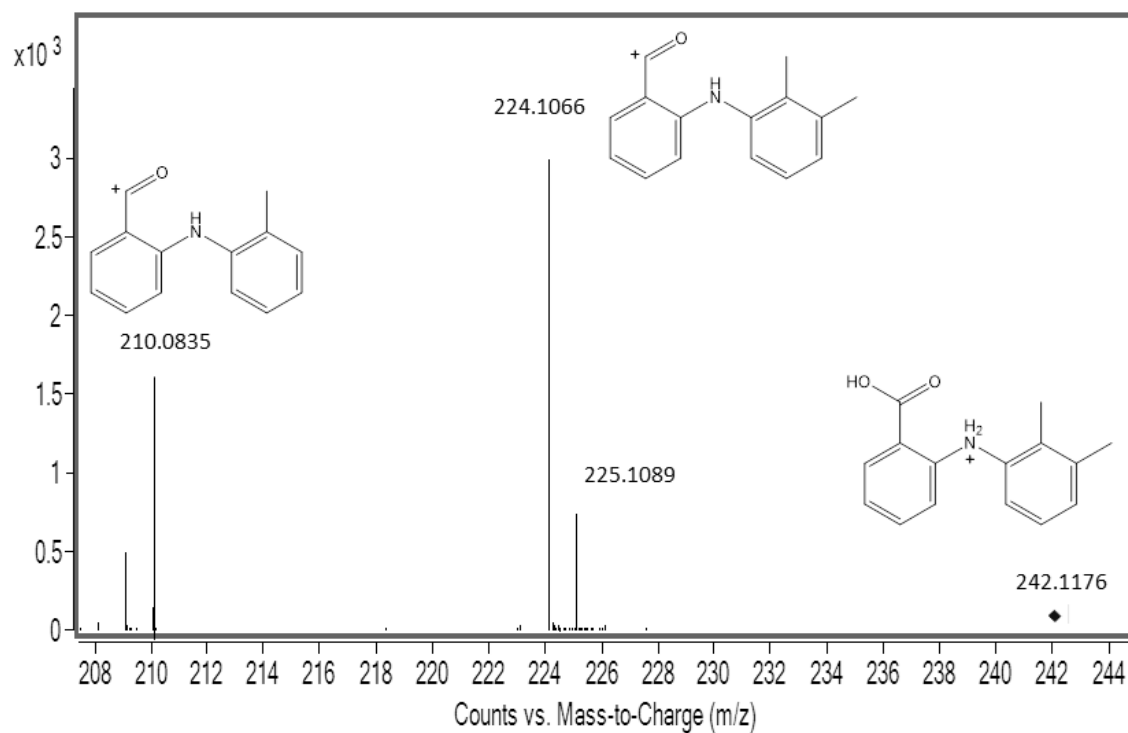

| Measured<br>(M+H) <sup>+</sup> | Calculated<br>(M+H) <sup>+</sup> | Molecular<br>formula               | Error<br>(ppm) |
|--------------------------------|----------------------------------|------------------------------------|----------------|
| 224.1066                       | 224.1070                         | C <sub>15</sub> H <sub>14</sub> NO | 1.75           |
| 210.0835                       | 210.0913                         | C <sub>14</sub> H <sub>12</sub> NO | 37.13          |

**Fig. S1**MS/MS spectrum for chlorination Mfe and its fragmentation by-products.

**b) Mfe-138**

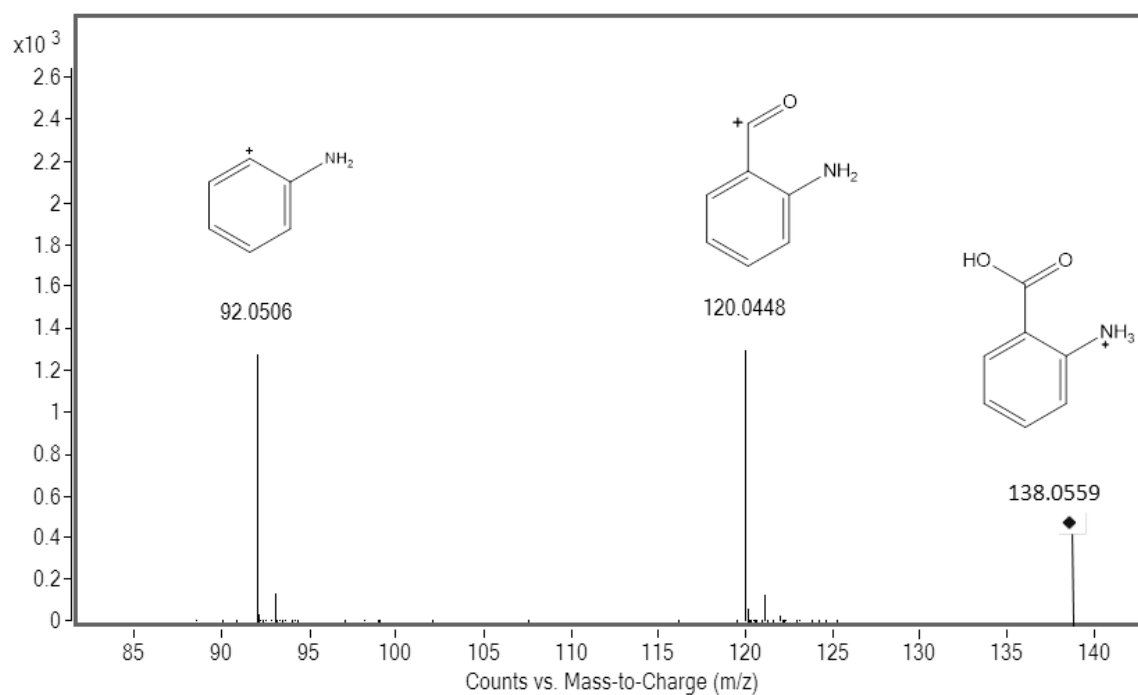

| Measured<br>( $M+H$ ) <sup>+</sup> | Calculated<br>( $M+H$ ) <sup>+</sup> | Molecular formula                | Error<br>(ppm) |
|------------------------------------|--------------------------------------|----------------------------------|----------------|
| 120.0448                           | 120.0444                             | C <sub>7</sub> H <sub>6</sub> NO | -3.8           |
| 92.0506                            | 92.0495                              | C <sub>6</sub> H <sub>6</sub> N  | -11.74         |

**Fig. S1** (*continued*)

**c) Mfe-258**

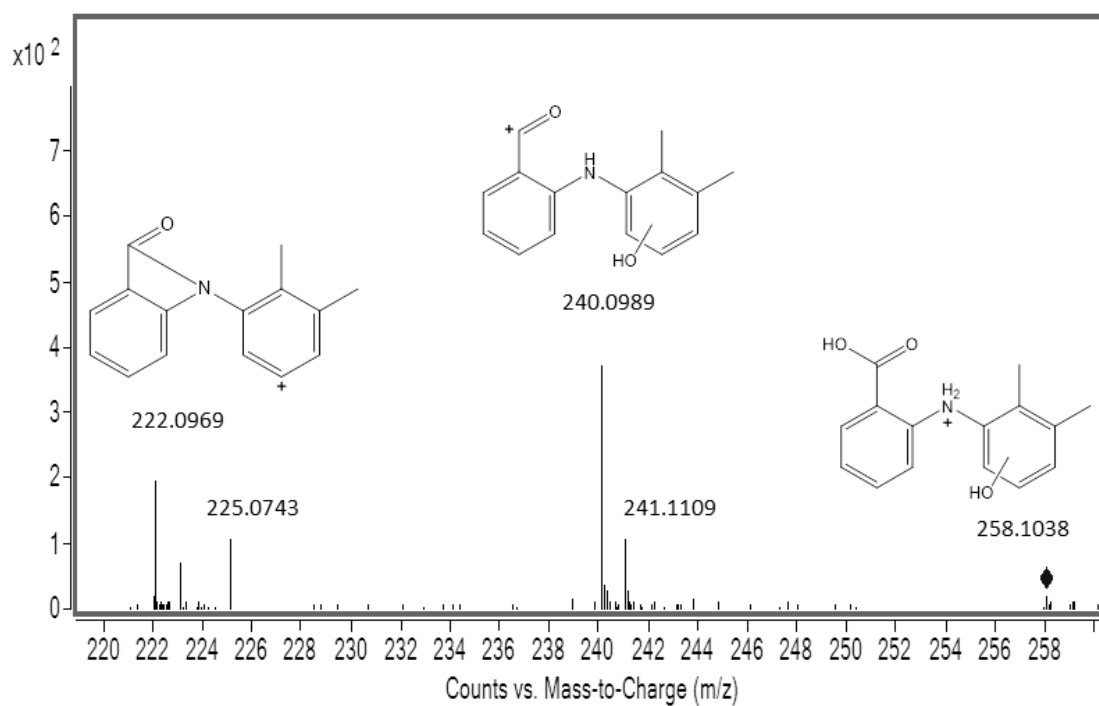

| Measured<br>(M+H) <sup>+</sup> | Calculated<br>(M+H) <sup>+</sup> | Molecular<br>formula                            | Error (ppm) |
|--------------------------------|----------------------------------|-------------------------------------------------|-------------|
| 240.0989                       | 240.1019                         | C <sub>15</sub> H <sub>14</sub> NO <sub>2</sub> | 12.44       |
| 222.0969                       | 222.0913                         | C <sub>15</sub> H <sub>12</sub> NO              | -25.07      |

**Fig. S1** (*continued*)

**d) Mfe- 256**

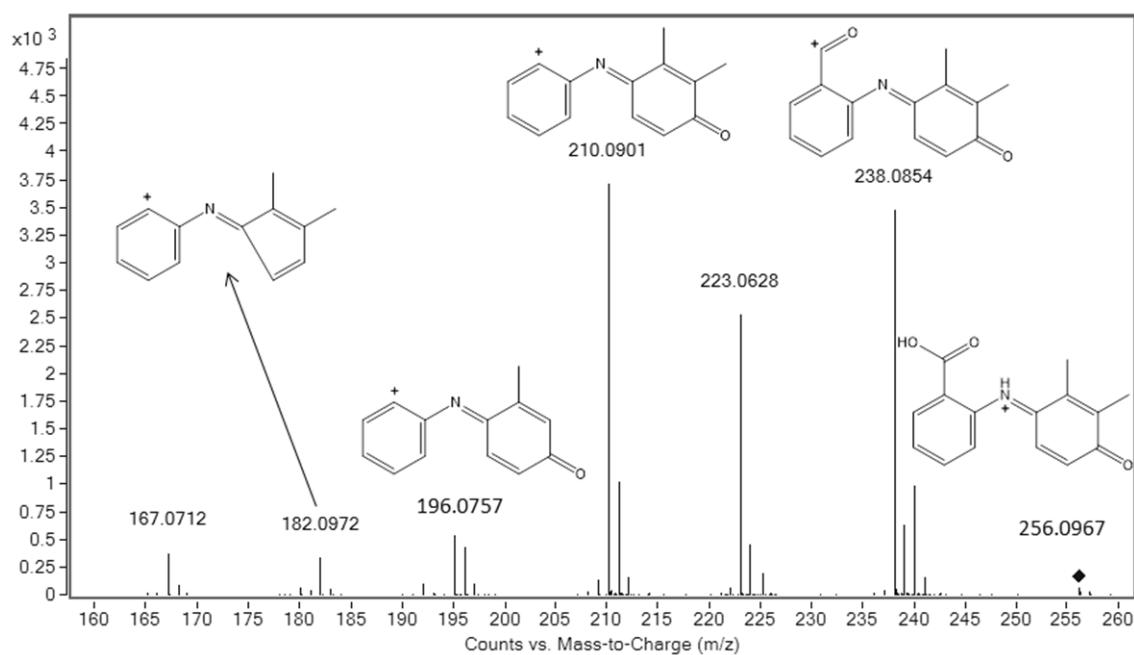

| Measured<br>(M+H) <sup>+</sup> | Calculated<br>(M+H) <sup>+</sup> | Molecular<br>formula                            | Error<br>(ppm) |
|--------------------------------|----------------------------------|-------------------------------------------------|----------------|
| 238.0854                       | 238.0863                         | C <sub>15</sub> H <sub>12</sub> NO <sub>2</sub> | 3.77           |
| 210.0901                       | 210.0913                         | C <sub>14</sub> H <sub>12</sub> NO              | 5.74           |
| 196.0757                       | 196.0757                         | C <sub>13</sub> H <sub>10</sub> NO              | 12.11          |
| 182.0972                       | 182.0964                         | C <sub>13</sub> H <sub>12</sub> N               | -4.26          |

**Fig. S1** (*continued*)

e) Mfe-290

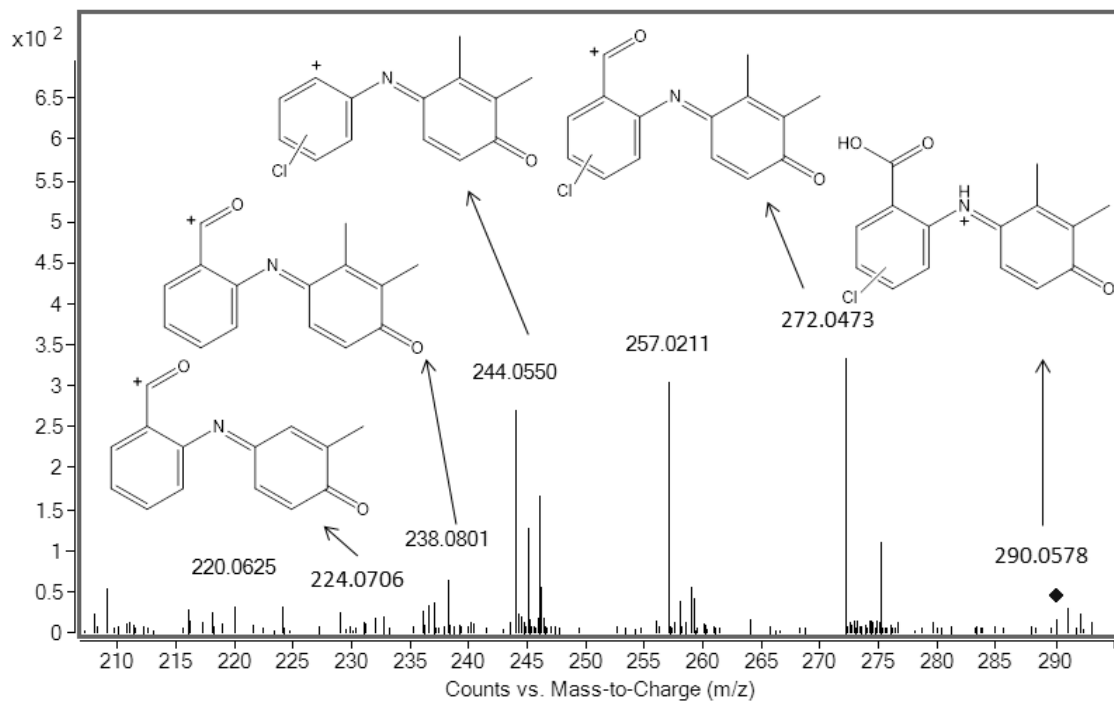

| Measured<br>(M+H) <sup>+</sup> | Calculated<br>(M+H) <sup>+</sup> | Molecular<br>formula                              | Error<br>(ppm) |
|--------------------------------|----------------------------------|---------------------------------------------------|----------------|
| 272.0473                       | 272.0473                         | C <sub>15</sub> H <sub>11</sub> ClNO <sub>2</sub> | 2.47           |
| 244.0550                       | 244.0524                         | C <sub>14</sub> H <sub>11</sub> ClNO              | -10.72         |
| 238.0801                       | 238.0863                         | C <sub>15</sub> H <sub>12</sub> NO <sub>2</sub>   | 25.71          |
| 224.0706                       | 224.0706                         | C <sub>14</sub> H <sub>10</sub> NO <sub>2</sub>   | -22.43         |

Fig. S1 (continued)
